# Supplementary material
Source: MDPI journal article supplement (https://www.mdpi.com/2071-1050/11/13/3672)
Supplement: s1 [file s1]

Archive with 4 entries (4 files):
- FORM1-HYP_Crossroads_EN.pdf
- FORM2-BAU_Crossroads_EN_.pdf
- FORM3-OBJ_Crossroads_EN.pdf
- FORM4-ALT_Crossroads_EN.pdf
