# Supplementary material
Source: MDPI journal article supplement (https://www.mdpi.com/2071-1050/11/13/3672)
Supplement: s1 [file s1 › FORM1-HYP_Crossroads_EN.pdf]

## Crossroads-World. HYPOTHESIS

|      |  |
|------|--|
| TEAM |  |
|------|--|

For each option H1-2 (hypothesis) mark the selected option (a, b, c ...).

Hypotheses do not depend on human actions, hence they cannot be modified throughout the game!

### HYPOTHESIS

#### H1: Availability of non-renewable energy resources (oil, coal, natural gas and uranium):

- a) "Peak of non-renewable energy resources" (medium availability according to literature)
- b) "Peak of non-renewable energy resources" (high availability according to literature)
- c) No significant restrictions to extraction during the simulation period
- d) Disaggregated response by type of fuel (complete table below)

|             | "Peak of non-renewable energy resources" (average availability according to literature) | "Peak of non-renewable energy resources" (high availability according to literature) | No significant restrictions on extraction during the simulation period |
|-------------|-----------------------------------------------------------------------------------------|--------------------------------------------------------------------------------------|------------------------------------------------------------------------|
| Coal        |                                                                                         |                                                                                      |                                                                        |
| Oil         |                                                                                         |                                                                                      |                                                                        |
| Natural gas |                                                                                         |                                                                                      |                                                                        |
| Uranium     |                                                                                         |                                                                                      |                                                                        |

#### H2: Damages produced by climate change:

- a) Not significant before 2060
- b) Significant before 2060 (ability to restrict economic growth in standard economic scenarios, see T2)
- c) Very significant before 2060 (ability to create a recession in standard economic growth scenarios, see T2)
