# Supplementary material
Source: MDPI journal article supplement (https://www.mdpi.com/2071-1050/11/13/3672)
Supplement: s1 [file s1 › FORM2-BAU_Crossroads_EN_.pdf]

## Crossroads-World. SCENARIO "BUSINESS AS USUAL"

|      |  |
|------|--|
| TEAM |  |
|------|--|

For each option G1-G11 (goals), mark the selected option (a, b, c ...).

It is recommendable to read the entire form before starting to select choices.

As reference, past historical trends are indicated by underlining.

---

### BRIEF EXPLANATION OF THE "NARRATIVE PLOT" CHOSEN UNTIL 2050-2080:

---

#### "BUSINESS AS USUAL": SPECIFIC GOALS

##### G1: Evolution of the population:

- a) Lower growth than average forecast trends (~ 8,500 million people in 2050)
- b) Average forecast trends (~ 9,200 million people in 2050)
- c) Growth faster than average forecast trends (~ 10,000 million people in 2050)
- d) Custom variation: \_\_\_\_\_% / year from the year \_\_\_\_\_.
- e) Set target for 2050: \_\_\_\_\_ million people. Extrapolation of historical trends until the year \_\_\_\_\_.

##### G2: Planned evolution of GDP per capita:

- a) Lower growth than "standard" growth (+ 1% / person / year)
- b) "Standard" growth (average 2015-2050: + 3% / person / year)
- c) Higher growth than "standard" growth (average 2015-2050: 4.5% / person / year)
- d) Custom variation: \_\_\_\_\_% / year from the year \_\_\_\_\_.
- e) Set target for 2050: \_\_\_\_\_ US \$ per capita. Extrapolation of historical trends until the year \_\_\_\_\_.

##### G3: Economic structure's evolution:

- a) Approximately same as last decade's.
- b) Gradual evolution of initial's structure from year \_\_\_\_\_ to year \_\_\_\_\_ until the current Denmark's economic structure is reached.
- c) Deep restructuration from year \_\_\_\_\_ to year \_\_\_\_\_ in order to achieve an economic structure more efficient and prioritizing less energy-intensive sectors.

##### G4: Global reforestation program to capture carbon from 2020?

- a) No
- b) Yes

##### G5: Nuclear energy:

- a) Constant installed capacity at current levels
- b) No new nuclear power plants are installed, and the capacity currently in use is being withdrawn as it reaches the end of its lifetime.
- c) Installed nuclear capacity variation: \_\_\_\_\_% / year from the year \_\_\_\_\_.

**G6: Planned production of liquid biofuels:**

- a) Constant production at current levels
- b) Growth following historical trends (+ 11% / year)
- c) Growth at a higher rate than current trends (+ 25% / year) from the year \_\_\_\_\_.
- d) Custom variation: \_\_\_\_\_% / year from the year \_\_\_\_\_.

**G7: Planned installation of power plants for electricity generation using renewable sources:**

- a) Lower growth than historical trends (+ 10% / year<sup>1</sup>) from the year \_\_\_\_\_.
- b) Growth following historical trends (+ 20% / year<sup>1</sup>)
- c) Higher growth than historical trends (+ 30% / year<sup>1</sup>) from the year \_\_\_\_\_.
- d) Custom variation: \_\_\_\_\_% / year<sup>1</sup> from the year \_\_\_\_\_.
- e) Indicate variation by technology in Table BAU1

**G8: Planned heat production from renewable sources:**

- a) Lower growth than historical trends (+ 3% / year) from the year \_\_\_\_\_.
- b) Growth following historical trends (+ 6% / year)
- c) Higher growth than historical trends (+ 15% / year) from the year \_\_\_\_\_.
- d) Custom variation: \_\_\_\_\_% / year from the year \_\_\_\_\_.
- e) Indicate variation by technology in Table BAU1

**G9: Inland transportation:**

- a) Continuity of dependence on oil (~ 80% in 2050)
- b) Transition to gas and electric vehicles from the year \_\_\_\_\_ (oil would still cover ~ 50% in 2050).

**G10: Technological change. Trends in the evolution of energy efficiency by sector and fuel:**

- a) Constant energy efficiency at current values
- b) Extrapolation of historical trends (+ 0.5% / year)
- c) Higher improvement in energy efficiency than the historical trends (+ 1.1% / year) from the year \_\_\_\_\_.
- d) Lower improvement in energy efficiency than the historical trends (+ 0.33% / year) from the year \_\_\_\_\_.

**G11: Mineral recycling rates:**

- a) Constant current rates
- b) Improvement of recycling rates to \_\_\_\_\_% / year for all minerals from the year \_\_\_\_\_.
- c) Indicate specific rates for each mineral in Table BAU2

**G12: Other greenhouse gas (GHG) emissions apart from CO<sub>2</sub> from the combustion of fossil fuels (methane, changes in land use, etc.):**

- a) Continuation of the current trends
- b) Rapid reduction of other GHG emissions
- c) Slow reduction of other GHG emissions
- d) Worsening of current trends

---

**After the simulation: how would you describe the world situation in 2050-2080? Do current trends lead us to levels of final energy consumption and temperature increase that the group had set as desirable for the future?**

**ADDITIONAL TABLES**

1 Except hydroelectric, which due to the large installed power has grown at a slower pace in recent decades (+ 3% / year).

Table BAU1: G7 &amp; G8

| Renewable technology          | Customized variations (optional) |
|-------------------------------|----------------------------------|
| <b>Electricity generation</b> |                                  |
| Hydroelectricity              |                                  |
| Geothermal                    |                                  |
| Biomass                       |                                  |
| Marine                        |                                  |
| Earth wind                    |                                  |
| Offshore wind                 |                                  |
| Solar photovoltaic            |                                  |
| Solar CSP                     |                                  |
| <b>Heat generation</b>        |                                  |
| Biomass for heat              |                                  |
| Solar for heat                |                                  |
| Geothermal for heat           |                                  |

Table BAU2: G11

| Mineral         | Recycling rate in 2060 (optional) |
|-----------------|-----------------------------------|
| Aluminium (Al)  |                                   |
| Cadmium (Cd)    |                                   |
| Chromium (Cr)   |                                   |
| Copper (Cu)     |                                   |
| Gallium (Ga)    |                                   |
| Indium (In)     |                                   |
| Iron (Fe)       |                                   |
| Lithium (Li)    |                                   |
| Magnesium (Mg)  |                                   |
| Manganese (Mn)  |                                   |
| Molybdenum (Mo) |                                   |
| Nickel (Ni)     |                                   |
| Lead (Pb)       |                                   |
| Silver (Ag)     |                                   |
| Tin (Sn)        |                                   |
| Tellurium (Te)  |                                   |
| Titanium (Ti)   |                                   |
| Vanadium (V)    |                                   |
| Zinc (Zn)       |                                   |
