# Supplementary material
Source: MDPI journal article supplement (https://www.mdpi.com/2071-1050/11/13/3672)
Supplement: s1 [file s1 › FORM3-OBJ_Crossroads_EN.pdf]

## ***Crossroads-World.* DESIRED OBJECTIVES**

|      |  |
|------|--|
| TEAM |  |
|------|--|

---

### **DESIRED OBJECTIVES FOR 2050-2080**

Each team will agree on the objectives for the period 2050-2080 before performing the simulations. However, the team is free to modify the desired objectives throughout the game.

**O1: Stabilization of the average temperature increase compared to pre-industrial levels** below \_\_\_\_°C.

**O2: Well-being:** Goal for the entire world population for 2050-2080 (final energy consumption per capita as approximation): \_\_\_\_\_ GJ per capita.
